# Supplementary material for: Cu-doped La0.5Sr0.5CoO3−δ perovskite as a highly efficient and durable electrocatalyst for hydrogen evolution
Source: Royal Society of Chemistry journal article supplement (doi:10.1039/d3dt00866e), 2023-01-01
Supplement: d3dt00866e1.pdf [file d3dt00866e1.pdf]

## Supporting information

### **Cu-doped $\text{La}_{0.5}\text{Sr}_{0.5}\text{CoO}_{3-\delta}$ perovskite as a highly efficient and durable electrocatalyst for hydrogen evolution**

Xue Yang, Fuhe Le, Zikun Zhou, Wei Jia\*, Dehuo Zhou, Xianhao Chen

State Key Laboratory of Chemistry and Utilization of Carbon Based Energy Resources; Key Laboratory of Advanced Functional Materials, Autonomous Region; Institute of Applied Chemistry, College of Chemistry, Xinjiang University, Urumqi, 830046, Xinjiang, PR China.

E-mail: [jia3816892@163.com](mailto:jia3816892@163.com)

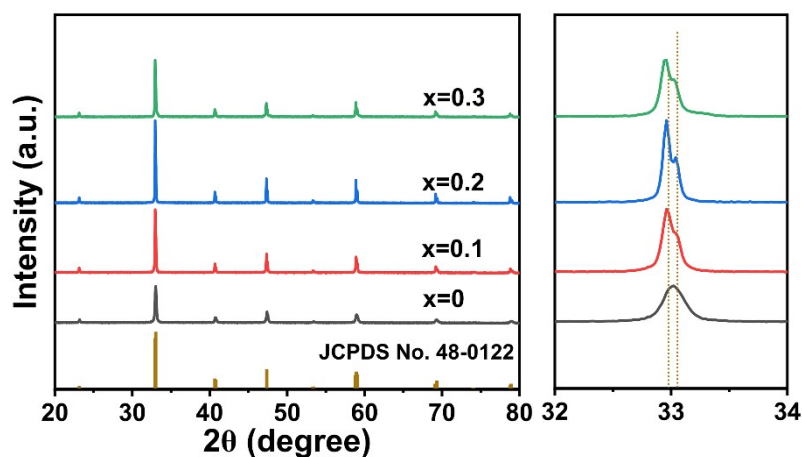

**Figure S1.** XRD patterns of LSCCu<sub>x</sub> ( $x = 0, 0.1, 0.2, 0.3$ ) and an expanded view of the patterns in a  $2\theta$  range of  $32^\circ$ - $34^\circ$  shown on the right.

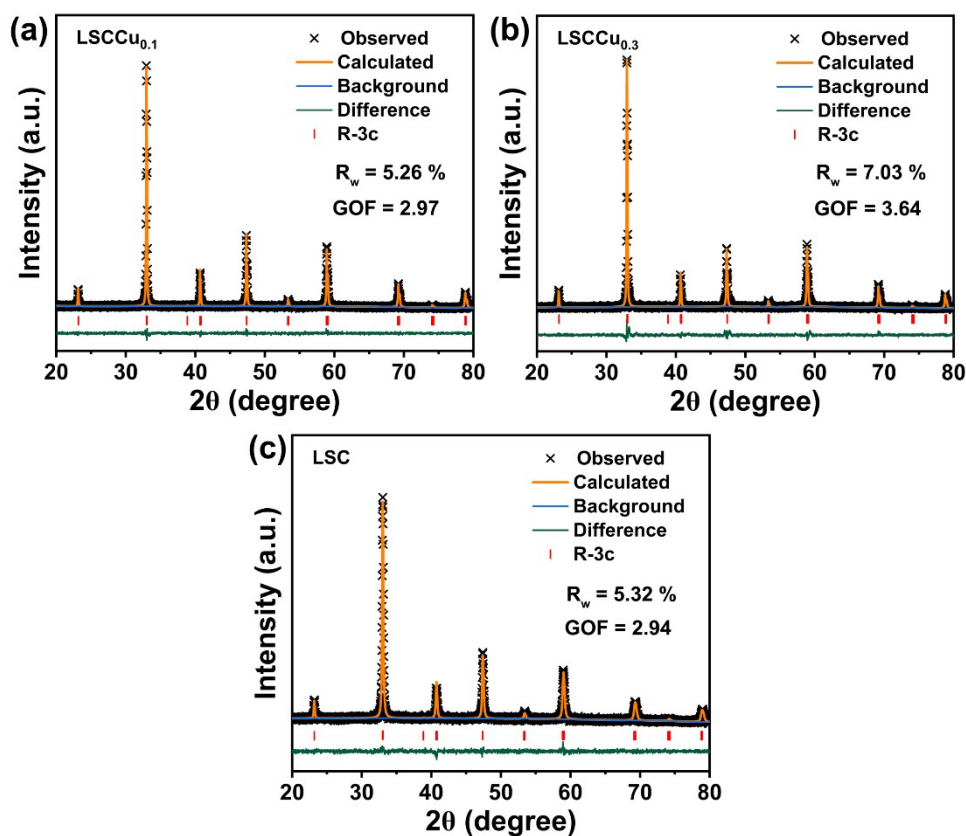

**Figure S2.** Rietveld refinement analyses on the XRD patterns of (a) LSCCu<sub>0.1</sub>, (b) LSCCu<sub>0.3</sub>, and (c) LSC.

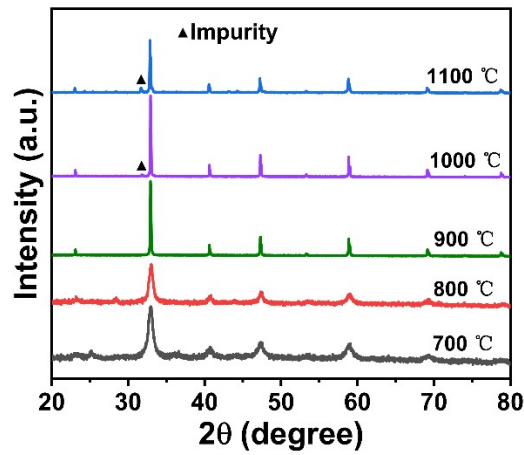

**Figure S3.** XRD patterns of LSCCu<sub>0.2</sub> prepared at 700, 800, 900, 1000, and 1100 °C, respectively.

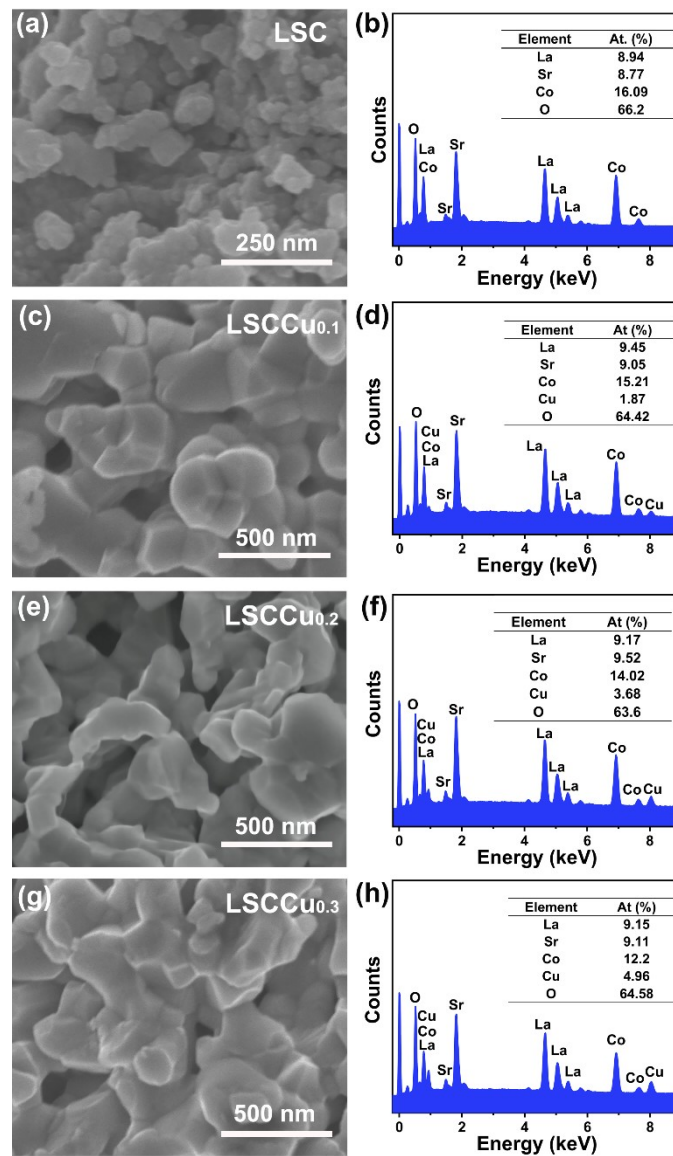

**Figure S4.** SEM images of (a) LSC, (c) LSCCu<sub>0.1</sub>, (e) LSCCu<sub>0.2</sub>, and (g) LSCCu<sub>0.3</sub>. EDX spectra of (b) LSC, (d) LSCCu<sub>0.1</sub>, (f) LSCCu<sub>0.2</sub>, and (h) LSCCu<sub>0.3</sub>.

**Table S1.** Element contents of the  $\text{LSCCu}_x$  ( $x = 0, 0.1, 0.2, 0.3$ ) determined by ICP-OES.

| Catalysts            | Co (wt%) | Cu (wt%) | Atomic ratio (Co/Cu) |
|----------------------|----------|----------|----------------------|
| LSC                  | 25.49    | 0.00     | —                    |
| $\text{LSCCu}_{0.1}$ | 22.97    | 2.81     | 8.87                 |
| $\text{LSCCu}_{0.2}$ | 21.54    | 5.73     | 4.08                 |
| $\text{LSCCu}_{0.3}$ | 18.06    | 8.65     | 2.26                 |

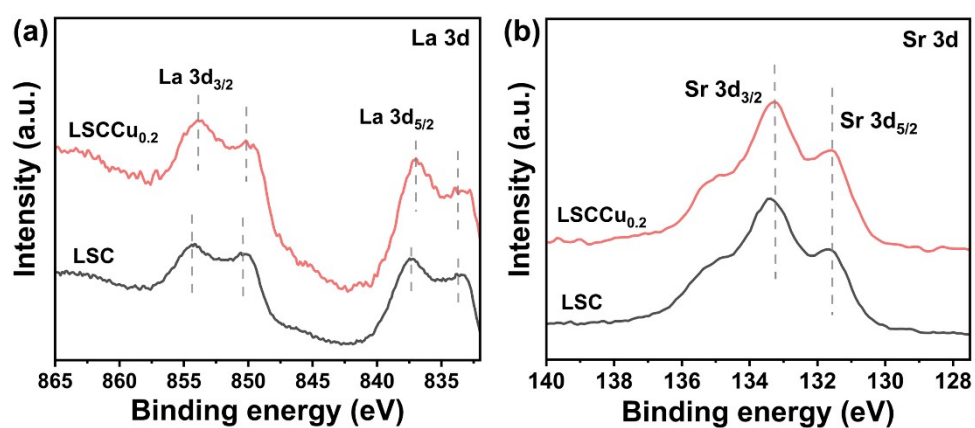

**Figure S5.** XPS spectra of the  $\text{LSCCu}_{0.2}$  and LSC: (a) La 3d, (b) Sr 3d.

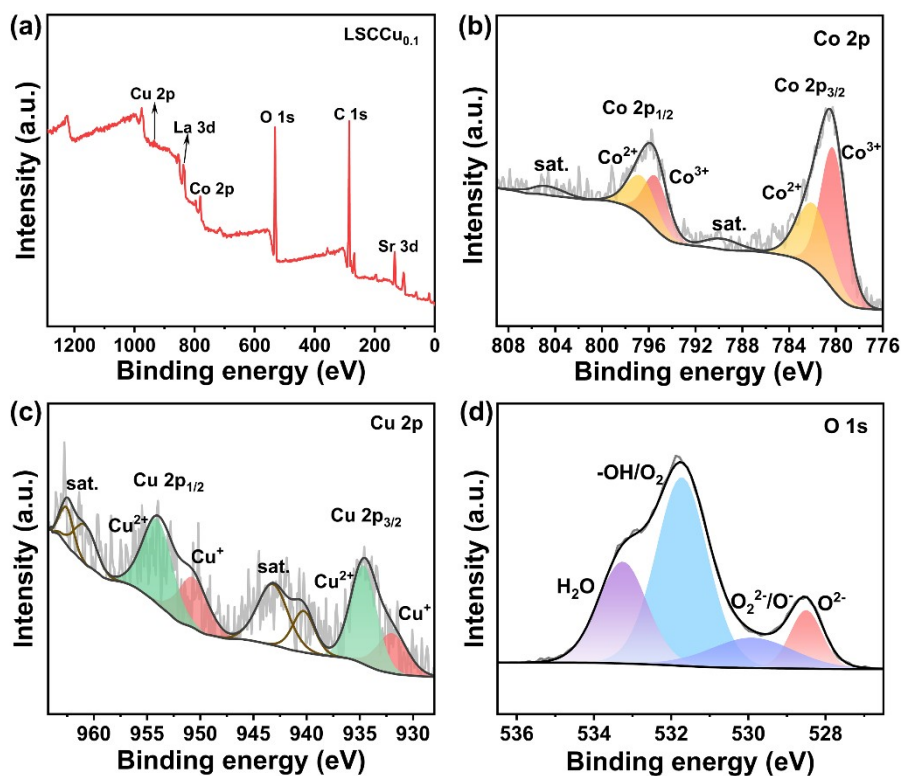

**Figure S6.** XPS spectra of LSCCu<sub>0.1</sub>: (a) the survey spectrum, (b) Co 2p, (c) Cu 2p, and (d) O 1s.

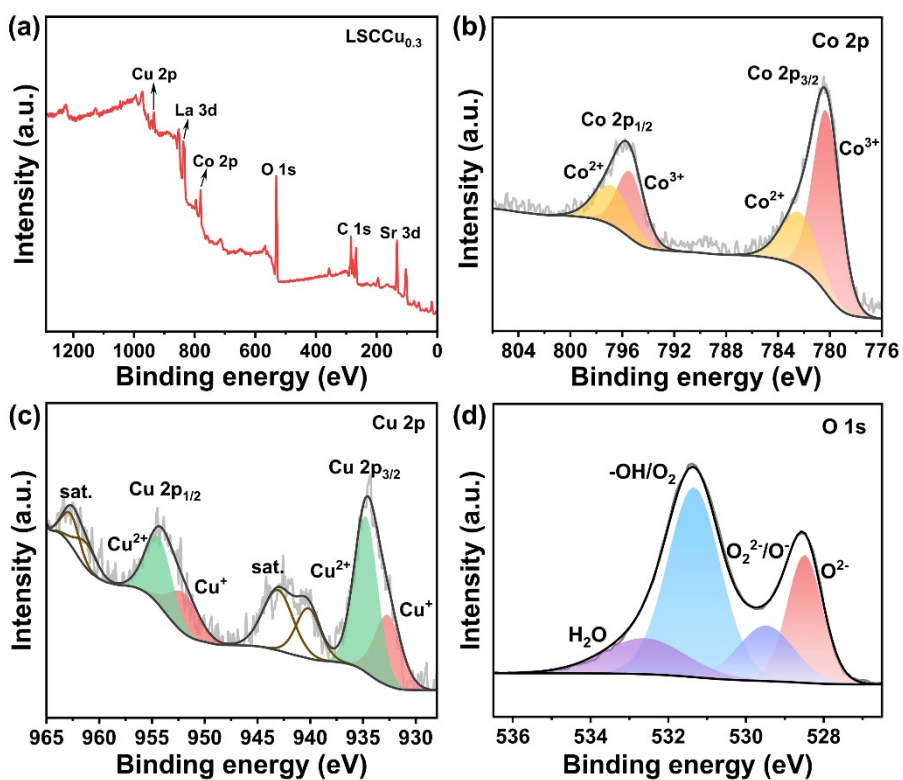

**Figure S7.** XPS spectra of LSCCu<sub>0.3</sub>: (a) the survey spectrum, (b) Co 2p, (c) Cu 2p, and (d) O 1s.

**Table S2.** The ratios of  $\text{Co}^{2+}$  to  $\text{Co}^{3+}$  in the  $\text{LSCCu}_x$  ( $x = 0, 0.1, 0.2, 0.3$ ).

| Catalysts            | $\text{Co}^{2+}/\text{Co}^{3+}$ |
|----------------------|---------------------------------|
| LSC                  | 1: 1.2                          |
| $\text{LSCCu}_{0.1}$ | 1: 1.5                          |
| $\text{LSCCu}_{0.2}$ | 1: 2.7                          |
| $\text{LSCCu}_{0.3}$ | 1: 1.9                          |

**Table S3.** The proportions of different kinds of oxygen species in  $\text{LSCCu}_x$  ( $x = 0, 0.1, 0.2, 0.3$ ).

| Catalysts            | Adsorbed $\text{H}_2\text{O}/\%$ | Adsorbed oxygen ( $-\text{OH}/\text{O}_2$ )/% | Highly oxidative oxygen ( $\text{O}_2^{2-}/\text{O}^-$ )/% | Lattice oxygen ( $\text{O}^{2-}$ )/% |
|----------------------|----------------------------------|-----------------------------------------------|------------------------------------------------------------|--------------------------------------|
| LSC                  | 13.8                             | 51.2                                          | 12.9                                                       | 22.1                                 |
| $\text{LSCCu}_{0.1}$ | 26.0                             | 50.9                                          | 13.2                                                       | 9.9                                  |
| $\text{LSCCu}_{0.2}$ | 23.4                             | 43.0                                          | 18.3                                                       | 15.3                                 |
| $\text{LSCCu}_{0.3}$ | 14.3                             | 48.7                                          | 15.1                                                       | 21.9                                 |

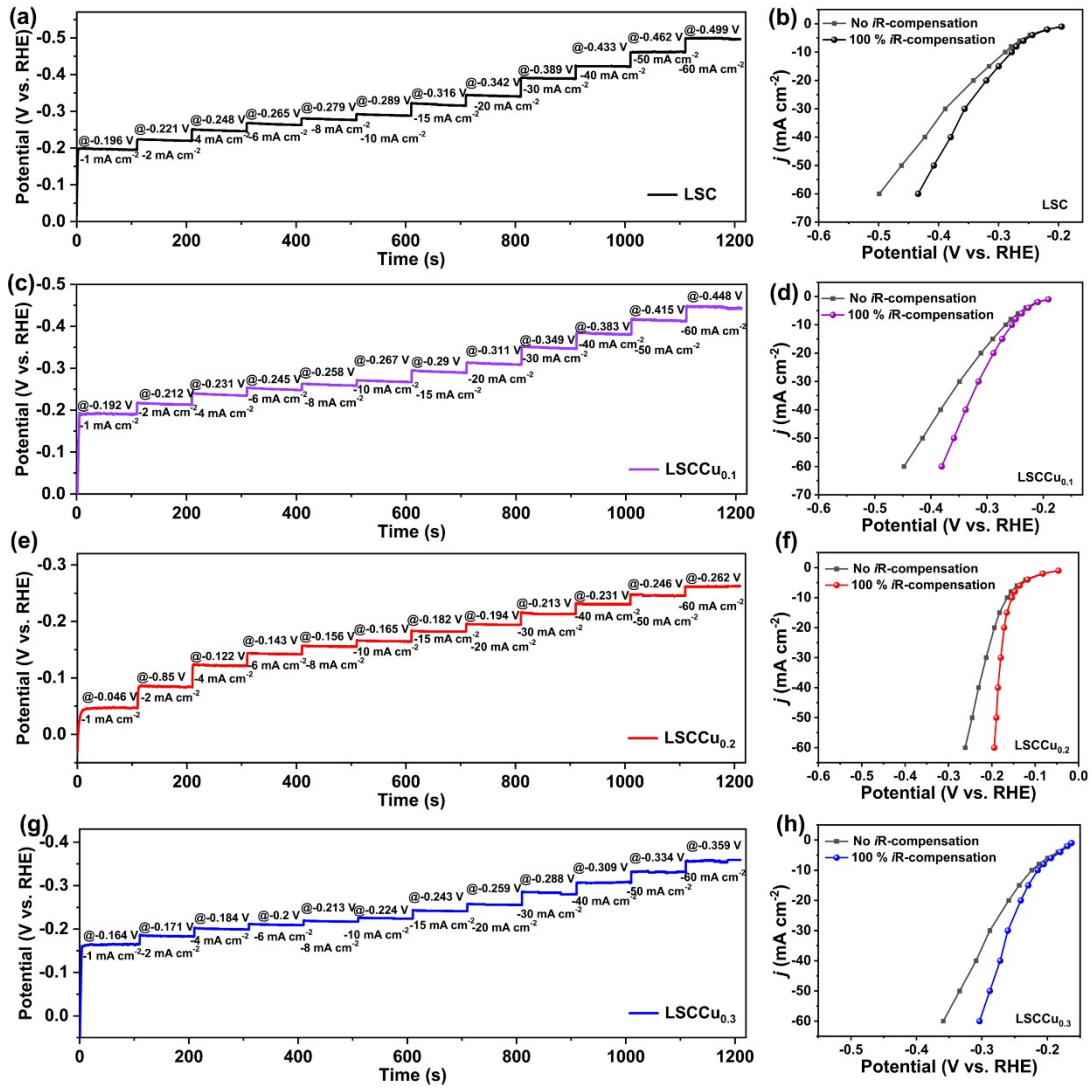

**Figure S8.** Chronopotentiometry responses of LSCCu<sub>x</sub> ( $x = 0, 0.1, 0.2,$  and  $0.3$ ) and corresponding plots of HER current densities with and without 100% *iR*-compensation.

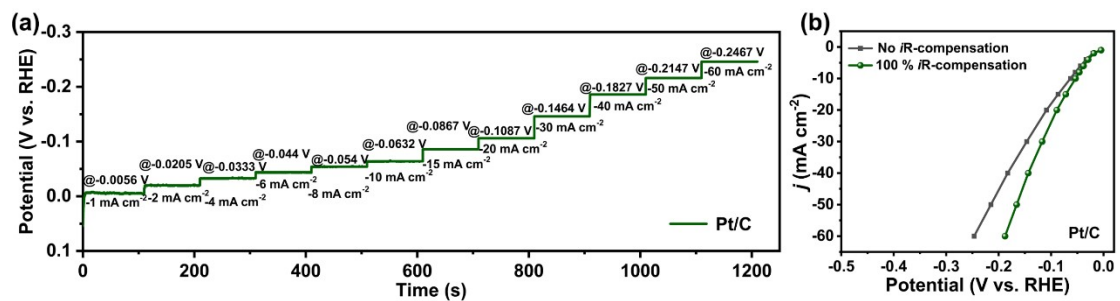

**Figure S9.** (a) Chronopotentiometry responses of Pt/C. (b) Plots of HER current densities with and without 100% *iR*-compensation of Pt/C.

**Table S4.** Comparisons of TOF of the LSCCu<sub>x</sub> (x = 0, 0.1, 0.2, 0.3).

| Catalysts            | TOF [H <sub>2</sub> s <sup>-1</sup> ] at η = 100 mV |
|----------------------|-----------------------------------------------------|
| LSC                  | 0.006                                               |
| LSCCu <sub>0.1</sub> | 0.016                                               |
| LSCCu <sub>0.2</sub> | 0.035                                               |
| LSCCu <sub>0.3</sub> | 0.012                                               |

According to the reported literatures, the turnover frequency (TOF) was calculated using the following equation<sup>1,2</sup>:

$$\text{TOF} = \frac{j \times A}{2 \times F \times n}$$

where  $j$  (mA cm<sup>-2</sup>) represents the current densities at an overpotential of 100 mV,  $A$  is the surface area of the glassy carbon electrode (0.196 cm<sup>2</sup>),  $F$  is the Faraday constant (96485 C mol<sup>-1</sup>), and  $n$  is the number of active sites (mol). The number 2 represents that two electrons are required to form one hydrogen molecule.

In this paper, Co ions are assumed to be accessible for catalyzing HER to get the value of TOF and the number of Co ions was determined by ICP-OES.

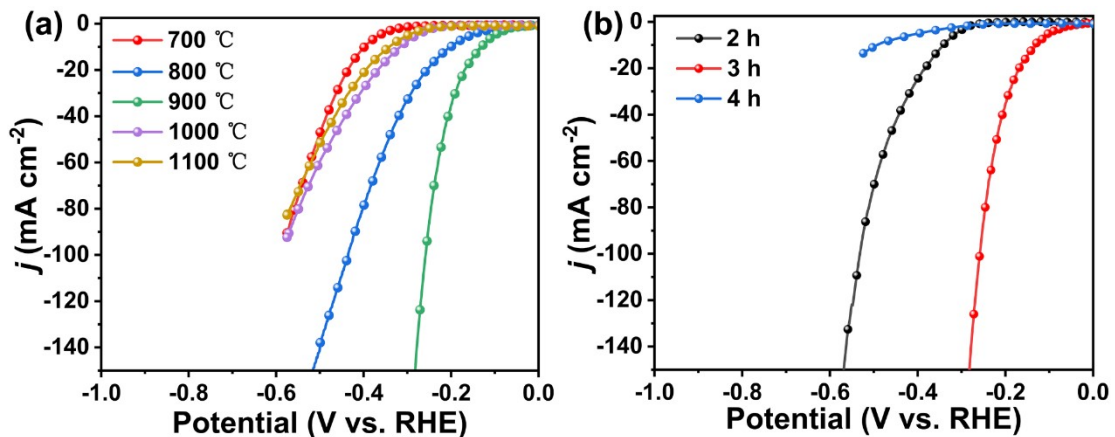

**Figure S10.** LSV curves of the LSCCu<sub>0.2</sub> prepared at different (a) calcination temperatures and (b) holding time.



**Table S5.** Summary of charge-transfer resistances ( $R_{ct}$ ) of the LSC, LSCCu<sub>0.1</sub>, LSCCu<sub>0.2</sub>, and LSCCu<sub>0.3</sub>.

| Catalysts            | $R_{ct}$ ( $\Omega$ ) |
|----------------------|-----------------------|
| LSC                  | 23.6                  |
| LSCCu <sub>0.1</sub> | 20.3                  |
| LSCCu <sub>0.2</sub> | 11.1                  |
| LSCCu <sub>0.3</sub> | 15.0                  |

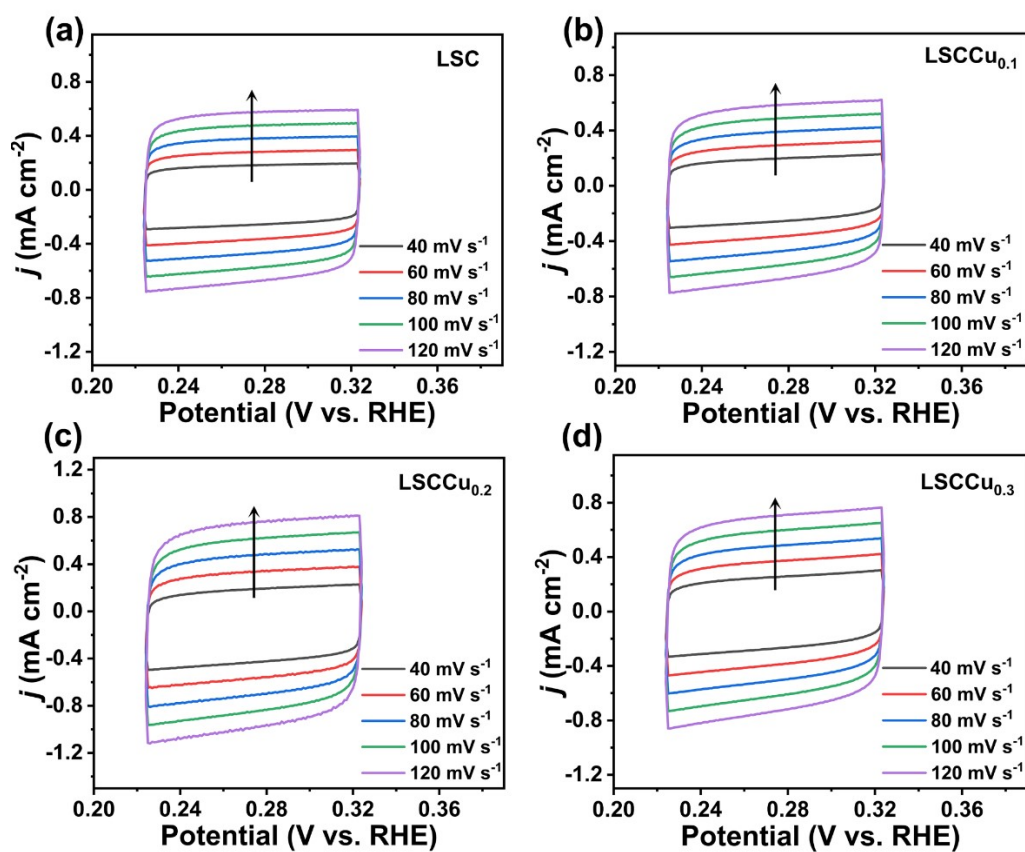

**Figure S11.** CV curves of (a) pristine LSC, (b) LSCCu<sub>0.1</sub>, (c) LSCCu<sub>0.2</sub>, and (d) LSCCu<sub>0.3</sub> at different scan rates in 1.0 M KOH.

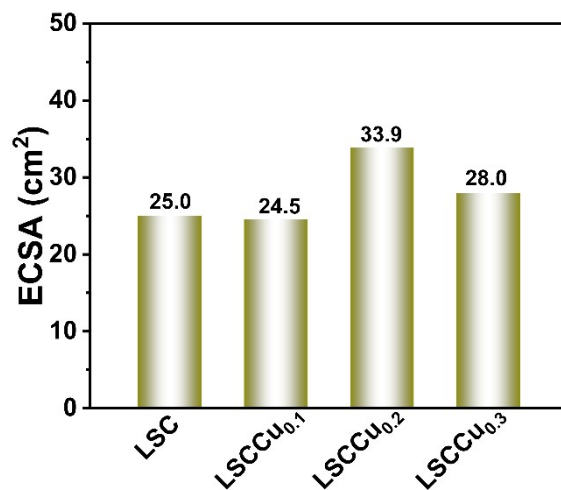

**Figure S12.** ECSA of the LSC, LSCCu<sub>0.1</sub>, LSCCu<sub>0.2</sub>, and LSCCu<sub>0.3</sub>.

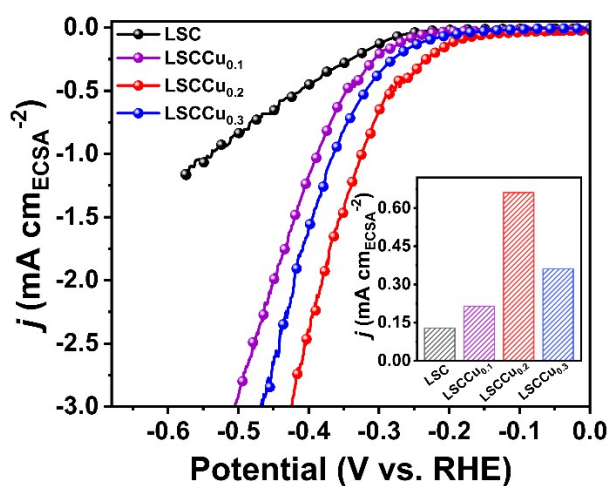

**Figure S13.** Specific activities (currents normalized to ECSA) of the LSC, LSCCu<sub>0.1</sub>, LSCCu<sub>0.2</sub>, and LSCCu<sub>0.3</sub> as a function of applied potential. Inset: specific activity at an overpotential of 300 mV.

**Table S6.** Comparisons of the HER performance of the LSCCu<sub>0.2</sub> with reported representative perovskite oxides in alkaline media.

| Catalysts                                                                                                                                         | Electrolyte | Loading<br>(mg <sub>catalyst</sub> cm <sup>-2</sup> ) | Substrate | $\eta_{10}$<br>(mV) | Tafel slope<br>(mV dec <sup>-1</sup> ) | Reference                                   |
|---------------------------------------------------------------------------------------------------------------------------------------------------|-------------|-------------------------------------------------------|-----------|---------------------|----------------------------------------|---------------------------------------------|
| La <sub>0.5</sub> Sr <sub>0.5</sub> Co <sub>0.8</sub> Cu <sub>0.2</sub> O <sub>3-<math>\delta</math></sub>                                        | 1 M KOH     | 0.255                                                 | GC        | 154                 | 120                                    | <b>This work</b>                            |
| SrIrO <sub>3</sub>                                                                                                                                | 0.1 M KOH   | 0.232                                                 | GC        | 139                 | 49                                     | Chem. Mater.,<br>2020, 32, 4509-4517        |
| La <sub>0.5</sub> Ba <sub>0.2</sub> Sr <sub>0.2</sub> Ca <sub>0.1</sub> Co <sub>0.8</sub><br>Fe <sub>0.2</sub> O <sub>3-<math>\delta</math></sub> | 1 M KOH     | 0.255                                                 | GC        | ~190                | 59                                     | Adv. Energy Mater.,<br>2017, 7, 1700666     |
| La <sub>0.5</sub> Ba <sub>0.25</sub> Sr <sub>0.25</sub> CoO <sub>3-<math>\delta</math></sub>                                                      | 1 M KOH     | 0.157                                                 | GC        | ~220                | 51                                     | Chem, 2018, 4, 2902-<br>2916                |
| Pr <sub>0.5</sub> (Ba <sub>0.5</sub> Sr <sub>0.5</sub> ) <sub>0.5</sub> Co <sub>0.8</sub> Fe <sub>0.2</sub><br>O <sub>3-<math>\delta</math></sub> | 1 M KOH     | 0.232                                                 | GC        | 237                 | 45                                     | Adv. Mater., 2016, 28,<br>6442-6448         |
| (Gd <sub>0.5</sub> La <sub>0.5</sub> )BaCo <sub>2</sub> O <sub>5.5+<math>\delta</math></sub>                                                      | 1 M KOH     | 0.232                                                 | GC        | 240                 | 27.6                                   | Nat. Commun.,<br>2019, 10, 3755             |
| PrBaCo <sub>2</sub> O <sub>5.8</sub>                                                                                                              | 1 M KOH     | 0.255                                                 | GC        | 240                 | 61                                     | Mater. Chem. Front.,<br>2020, 4, 1519-1529  |
| PrBaCo <sub>2</sub> O <sub>5+<math>\delta</math></sub> -1100                                                                                      | 0.1 M KOH   | 0.398                                                 | GC        | 245                 | 89                                     | J. Power Sources, 2019,<br>427, 194-200     |
| N-doped Sr <sub>2</sub> Fe <sub>1.5</sub> Mo <sub>0.5</sub> O <sub>6-<math>\delta</math></sub> -450                                               | 1 M KOH     | 1.5                                                   | CC        | 251                 | 138                                    | Mater. Today Energy,<br>2021, 20, 100695    |
| SrNb <sub>0.1</sub> Co <sub>0.7</sub> Fe <sub>0.2</sub> O <sub>3-<math>\delta</math></sub>                                                        | 0.1 M KOH   | 0.232                                                 | GC        | 262                 | 134                                    | Adv. Energy Mater.,<br>2017, 7, 1602122     |
| La <sub>0.1</sub> Sr <sub>0.9</sub> Fe <sub>0.5</sub> Co <sub>0.475</sub> P <sub>0.025</sub><br>O <sub>3-<math>\delta</math></sub>                | 1 M KOH     | 0.232                                                 | GC        | 280                 | 119                                    | ACS Materials Lett.,<br>2021, 3, 1258-1265  |
| NdBaMn <sub>2</sub> O <sub>5.5</sub>                                                                                                              | 1 M KOH     | ~0.4                                                  | GC        | 290                 | 87                                     | ACS Catal., 2018, 8, 364-<br>371            |
| LaCo <sub>0.94</sub> Pt <sub>0.06</sub> O <sub>3-<math>\delta</math></sub>                                                                        | 0.1 M KOH   | 0.3                                                   | CP        | 294                 | 148                                    | RSC Adv.,<br>2019, 9, 35646-35654           |
| Sr <sub>0.95</sub> Nb <sub>0.1</sub> Co <sub>0.7</sub> Ni <sub>0.2</sub> O <sub>3-<math>\delta</math></sub>                                       | 1 M KOH     | 1                                                     | CP        | 299                 | 80                                     | J. Mater. Chem. A,<br>2019,7, 19453-19464   |
| La <sub>0.96</sub> Ce <sub>0.04</sub> CoO <sub>3-<math>\delta</math></sub>                                                                        | 1 M KOH     | 0.734                                                 | GC        | 305                 | 144                                    | Nanoscale, 2021, 13,<br>9952                |
| SrCo <sub>0.7</sub> Fe <sub>0.25</sub> Mo <sub>0.05</sub> O <sub>3-<math>\delta</math></sub>                                                      | 1 M KOH     | 0.362                                                 | GC        | 323                 | 94                                     | Electrochim. Acta, 2019,<br>312, 128-136    |
| SrTi <sub>0.1</sub> Fe <sub>0.85</sub> Ni <sub>0.05</sub> O <sub>3-<math>\delta</math></sub><br>/CNT-700                                          | 0.1 M KOH   | ~0.724                                                | GC        | 340                 | 166                                    | Electrochim. Acta, 2018,<br>286, 47-54      |
| Ba <sub>0.5</sub> Sr <sub>0.5</sub> Co <sub>0.8</sub> Fe <sub>0.2</sub> O <sub>3-<math>\delta</math></sub>                                        | 1 M KOH     | 0.232                                                 | GC        | 342                 | 75                                     | Adv. Mater., 2016, 28,<br>6442-6448         |
| LaFe <sub>0.8</sub> Co <sub>0.2</sub> O <sub>3-<math>\delta</math></sub>                                                                          | 1 M KOH     | 0.232                                                 | GC        | ~400                | 113                                    | Adv. Mater. Interfaces,<br>2019, 6, 1801317 |

|                                                                                     |           |       |    |      |     |                                                    |
|-------------------------------------------------------------------------------------|-----------|-------|----|------|-----|----------------------------------------------------|
| $\text{La}_{0.5}\text{Sr}_{0.5}\text{CoO}_{3-\delta}$                               | 1 M KOH   | 0.385 | GC | ~420 | 95  | Nat. Commun.,<br>2019, 10, 1723                    |
| $\text{Ca}_2\text{FeRuO}_6$                                                         | 1 M KOH   | ---   | GC | 420  | --- | ACS Appl. Energy<br>Mater., 2021, 4, 1323-<br>1334 |
| $\text{La}_{0.8}\text{Sr}_{0.2}\text{Cr}_{0.69}\text{Ni}_{0.31}\text{O}_{3-\delta}$ | 0.1 M KOH | 0.401 | GC | 447  | 116 | Electrochim. Acta, 2019,<br>318, 120-129           |

In the table above, some abbreviations stand for:

$\eta_{10}$ : The overpotential required to reach a current density of  $10 \text{ mA cm}^{-2}$ .

GC: Glassy carbon.

CC: Carbon cloth.

CP: Carbon paper.

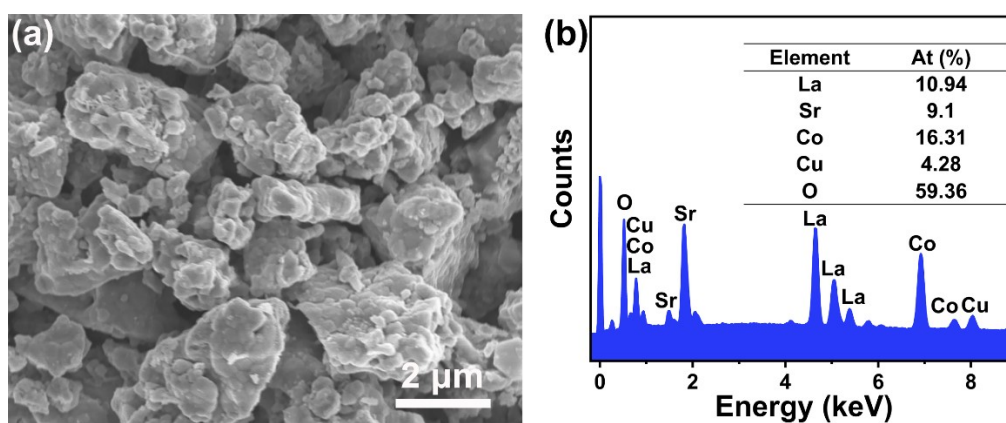

**Figure S14.** (a) SEM image and (b) EDX spectrum of the  $\text{LSCCu}_{0.2}$  after HER.

**Table S7.** The content of the metal ions in the electrolyte after HER determined by ICP-OES.

| elements | La | Sr   | Co | Cu |
|----------|----|------|----|----|
| mg/L     | 0  | 0.18 | 0  | 0  |

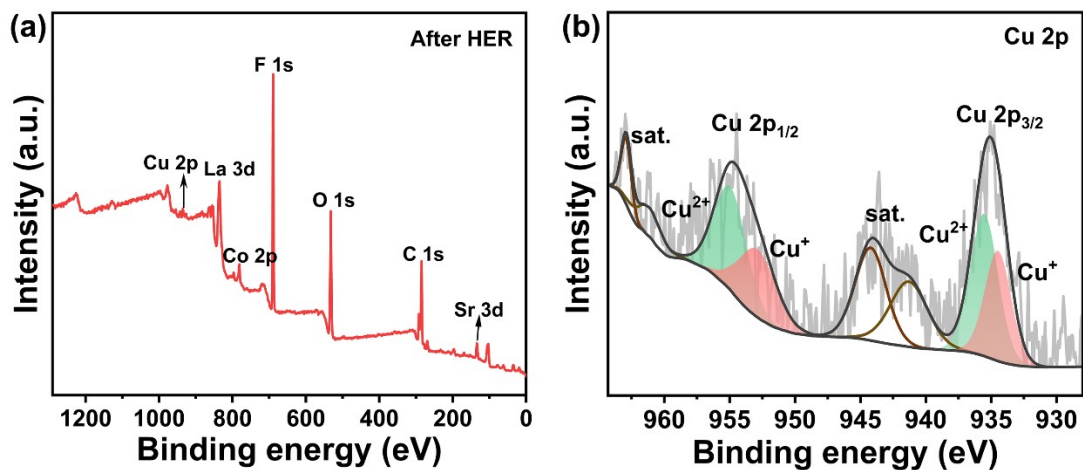

**Figure S15.** (a) XPS survey scan and (b) Cu 2p of the LSCCu<sub>0.2</sub> after HER.

### References

1. Y. Liu, S. Liu, Y. Wang, Q. Zhang, L. Gu, S. Zhao, D. Xu, Y. Li, J. Bao and Z. Dai, *J. Am. Chem. Soc.*, 2018, **140**, 2731-2734.
2. D. Xue, J. Cheng, P. Yuan, B.-A. Lu, H. Xia, C.-C. Yang, C.-L. Dong, H. Zhang, F. Shi, S.-C. Mu, J.-S. Hu, S.-G. Sun and J.-N. Zhang, *Adv. Funct. Mater.*, 2022, **32**, 2113191.
